# Supplementary material for: Study of green epoxy resins derived from renewable cinnamic acid and dipentene: synthesis, curing and properties
Source: Royal Society of Chemistry journal article supplement (doi:10.1039/c3ra47927g), 2014-01-01
Supplement: c3ra47927g.pdf [file c3ra47927g.pdf]

## Supporting information

For:

### **Study of green epoxy resins derived from renewable cinnamic acid and dipentene: Synthesis, curing and properties**

Junna Xin,<sup>1</sup> Pei Zhang,<sup>1</sup> Kun Huang,<sup>1,2</sup> Jinwen Zhang<sup>1\*</sup>

<sup>1</sup>Composite Materials and Engineering Center, Washington State University, Pullman, WA  
99164, USA

<sup>2</sup> Institute of Chemical Industry of Forestry Products, CAF; Nanjing 210042, China

\* To whom correspondence should be addressed. Tel.: 509-335-8723; Fax: 509-335-5077;

Email: [jwzhang@wsu.edu](mailto:jwzhang@wsu.edu)

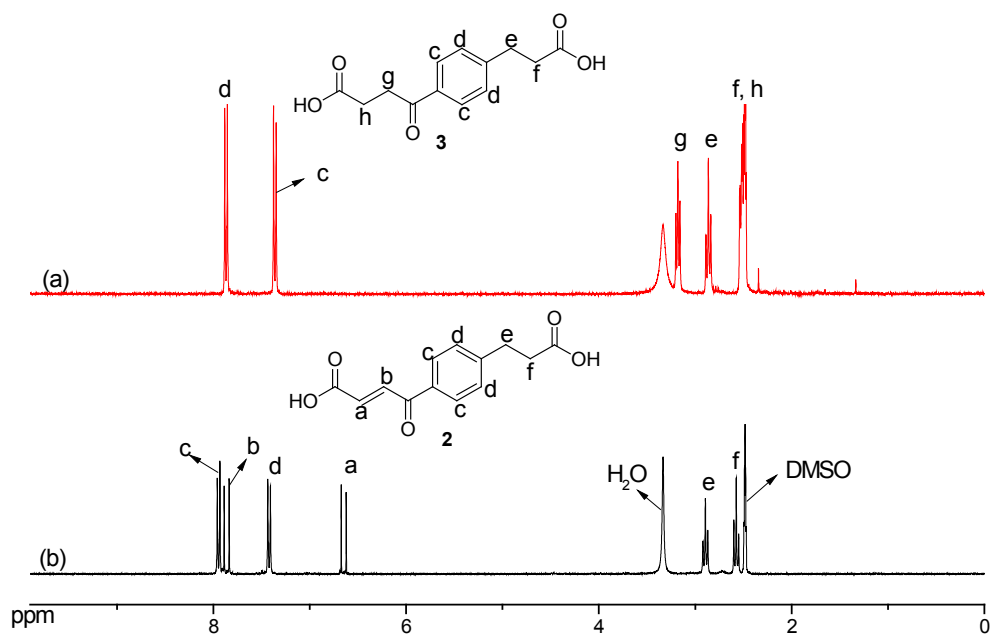

Figure S1.  $^1\text{H}$  NMR spectra of diacid 2 (b) and diacid 3 (a)

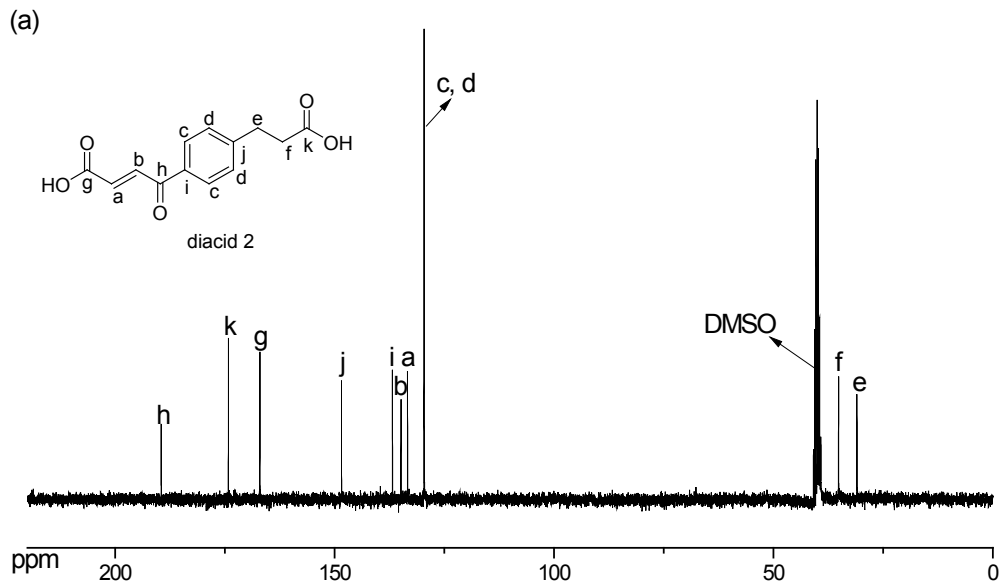

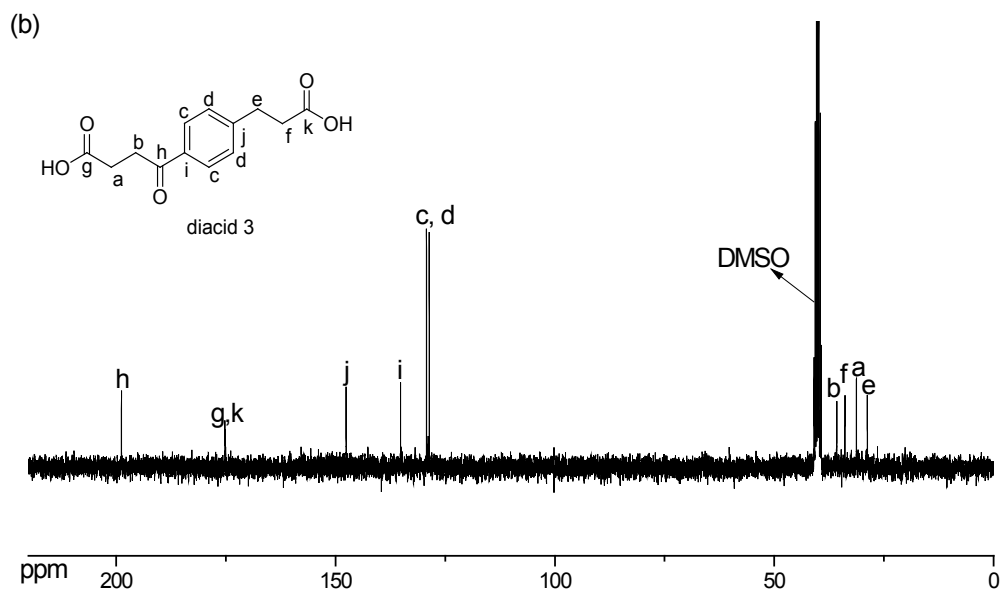

**Figure S2.**  $^{13}\text{C}$  NMR spectra of diacid **2** (a) and diacid **3** (b)

In the spectrum of diacid **2** (Figure S1b), the peaks (e, f) at 2.57 and 2.89 ppm were attributed to the protons of  $\text{CH}_2$  from cinnamic acid. The two *dd* peaks (a, b) at 6.52-6.67 and 7.84-7.89 ppm were assigned to the protons of  $\text{C}=\text{C}$  from maleic anhydride. Another two *dd* peaks (d, c) at 7.41-7.43 and 7.93-7.95 ppm suggested that Friedel-Craft reaction happened on *para* position of benzene rather than *ortho*-position. After reduction, the two *dd* peaks in diacid **2** disappeared. Accordingly, new peaks (h, g) at 2.84-2.89 and 3.16-3.20 ppm was found in the  $^1\text{H}$  NMR of diacid **3**, which were attributed to the protons on the two  $-\text{CH}_2-$  originated from  $\text{C}=\text{C}$ . The molecular structures of diacid **2** and diacid **3** also were characterized by  $^{13}\text{C}$  NMR (Figure S2). The chemical shifts of the carbons (a, b) of the double bonds shifted from 134.88, 133.38 ppm (Figure S2a) to 35.74, 31.27 ppm (Figure S2b), respectively.

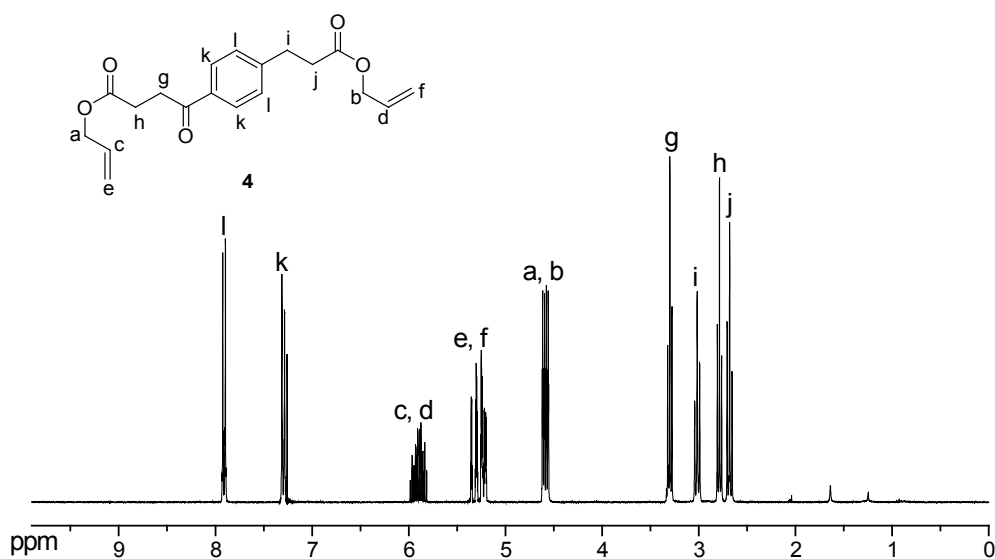

**Figure S3.** <sup>1</sup>H NMR of allyl 4-(4-(3-(allyloxy)-3-oxopropyl)phenyl)-4-oxobutanoate (compound 4).

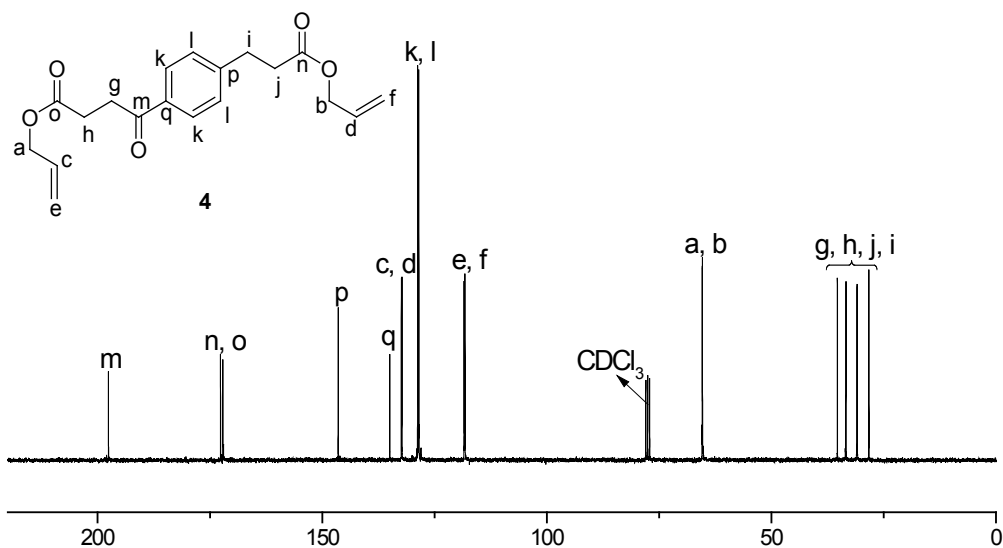

**Figure S4.** <sup>13</sup>C NMR of allyl 4-(4-(3-(allyloxy)-3-oxopropyl)phenyl)-4-oxobutanoate (compound 4).

In the <sup>1</sup>H NMR spectrum of compound 4, the protons in the region of 5.20-5.36 (e, f) and 5.81-5.98 ppm (c, d) indicate the presence of two allylic double bonds. The chemical shifts at 4.55-4.62 ppm corresponded to the four CH<sub>2</sub>-O protons (a, b). The chemical structure of compound 4

was also identified by  $^{13}\text{C}$  NMR (Figure 4S). The *dd* peaks at 132.26-132.39 and 118.22-118.42 ppm belonged to the carbons (c, d, e, f) of the double bonds.

Figure S5 shows the FTIR spectra of compound **4** and Cin-epoxy. The absorption peaks at 3010 and 1510  $\text{cm}^{-1}$  were attributed to the CH and C=C stretching of the double bonds of compound **4**. These two peaks in the spectrum of Cin-epoxy disappeared and a new peak at 930  $\text{cm}^{-1}$  which was attributed to the oxirane ring was noted. The structure of compound **4** and Cin-epoxy were also identified by ESI-MS.

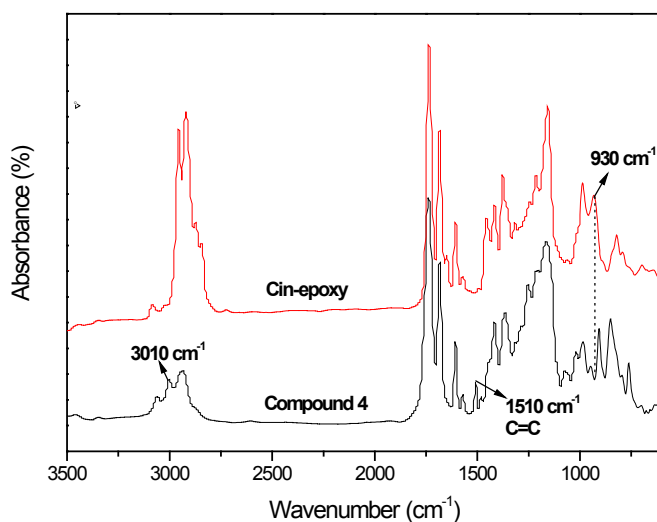

**Figure S5.** FTIR spectra of compound **4** and Cin-epoxy.
